# Supplementary material for: Physical, Chemical and Histological Characterization of Pectoralis major Muscle of Broilers Affected by Wooden Breast Myopathy
Source: MDPI journal article supplement (doi:10.3390/ani11030596), 2021-02-24
Supplement: s1 [file s1]

SENSORIAL ANALYSIS - CHICKEN WOODEN BREAST

Gender ( ) M ( ) F

Age group

- ( ) Under 21 years old
- ( ) 21 to 30 years old
- ( ) 31 to 40 years old
- ( ) 41 to 50 years old
- ( ) 51 to 60 years old
- ( ) 61 to 70 years old
- ( ) Above 70 years old

Education level

- ( ) Higher
- ( ) Higher (incomplete)
- ( ) 2nd grade
- ( ) 1<sup>o</sup> grade
- ( ) Non-literate student

Preferred product type

- ( ) Packed
- ( ) In bulk / by weight

Most frequently purchased product

- ( ) Whole
- ( ) Breast
- ( ) Breast fillet
- ( ) Thigh
- ( ) Leg quarter with back
- ( ) Wings
- ( ) Other parts

When you go shopping, you decide for:

- ( ) Price
- ( ) Brand
- ( ) Appearance
- ( ) Practicality
- ( ) Pack size
- ( ) Nutricional Value

Purchase frequency

- ( ) Every day
- ( ) Every week
- ( ) Once a month
- ( ) Every three months
- ( ) Every day
- ( ) Once a week
- ( ) 3 times a week
- ( ) Every 15 days

Frequency of consumption

- ( ) Once a month
- ( ) Less than once a month

How many people will consume this product? \_\_\_\_\_

PHOTO 1

Would you buy this chicken breast? Yes ( ) No ( )  
If no, why?

PHOTO 2

Would you buy this chicken breast? Yes ( ) No ( )  
If no, why?

PHOTO 3

Would you buy this chicken breast? Yes ( ) No ( )  
If no, why?

Any comments on the appearance of the photo samples?  
\_\_\_\_\_

Figure. Visual affective test sheet
